# Supplementary material for: Correlation and Influence of Seasonal variation of Diet with Gut Microbiota diversity and Metabolism Profile of chipmunk
Source: Research Square preprint supplement (doi:10.21203/rs.3.rs-1625886/v1), 2022-05-12
Supplement: Supplementary file 1 [file 68492a7fc6d0f4ebe968281a.xlsx]

## Sheet: Sheet1
	ANOSIM Results (Based on Euclidean Distance)
	Permutation N:	9999		ANOSIM Results
	Mean rank within:	187.9			Spring	Summer	Autumn
	Mean rank between:	231.5		Spring		0.0055	0.0005
	R:	0.2006		Summer	0.0055		0.2991
	p (same):	0.0009		Autumn	0.0005	0.2991
	SIMPER Results
	Spring/Summer 3.979 Average bray-curtis dissimilarity								Autumn/Summer 2.673 Average bray-curtis dissimilarity							Spring/Autumn 4.229 Average bray-curtis dissimilarity
	Taxon	Av. dissim	Contrib. %	Cumulative %	Mean Spring	Mean Summer			Taxon	Av. dissim	Contrib. %	Cumulative %	Mean Autumn	Mean Summer		Taxon	Av. dissim	Contrib. %	Cumulative %	Mean Spring	Mean Autumn
	Nucleotide Metabolism	0.75	18.85	18.85	0.0439	0.0373			Amino Acid Metabolism	0.6026	22.55	22.55	0.0857	0.089		Nucleotide Metabolism	0.7316	17.3	17.3	0.0439	0.0372
	Amino Acid Metabolism	0.6304	15.84	34.69	0.0877	0.089			Nucleotide Metabolism	0.3264	12.21	34.76	0.0372	0.0373		Amino Acid Metabolism	0.6545	15.48	32.78	0.0877	0.0857
	Carbohydrate Metabolism	0.6085	15.29	49.99	0.11	0.105			Energy Metabolism	0.2902	10.86	45.62	0.052	0.0529		Carbohydrate Metabolism	0.5521	13.06	45.84	0.11	0.106
	Xenobiotics Biodegradation and Metabolism	0.4078	10.25	60.24	0.0225	0.0198			Carbohydrate Metabolism	0.2739	10.25	55.87	0.106	0.105		Xenobiotics Biodegradation and Metabolism	0.4463	10.56	56.39	0.0225	0.0197
	Energy Metabolism	0.3637	9.142	69.38	0.0551	0.0529			Xenobiotics Biodegradation and Metabolism	0.2478	9.273	65.14	0.0197	0.0198		Energy Metabolism	0.4209	9.955	66.35	0.0551	0.052
	Metabolism of Cofactors and Vitamins	0.2906	7.304	76.68	0.0368	0.0388			Glycan Biosynthesis and Metabolism	0.2232	8.353	73.49	0.0227	0.0214		Glycan Biosynthesis and Metabolism	0.3139	7.424	73.77	0.02	0.0227
	Lipid Metabolism	0.2556	6.424	83.1	0.0311	0.029			Metabolism of Cofactors and Vitamins	0.1818	6.803	80.3	0.038	0.0388		Lipid Metabolism	0.3072	7.265	81.04	0.0311	0.0287
	Metabolism of Terpenoids and Polyketides	0.2191	5.507	88.61	0.0171	0.0152			Lipid Metabolism	0.1337	5.001	85.3	0.0287	0.029		Metabolism of Cofactors and Vitamins	0.2913	6.888	87.92	0.0368	0.038
	Glycan Biosynthesis and Metabolism	0.1989	4.999	93.61	0.02	0.0214			Metabolism of Terpenoids and Polyketides	0.1245	4.66	89.96	0.0147	0.0152		Metabolism of Terpenoids and Polyketides	0.2708	6.404	94.33	0.0171	0.0147
	Biosynthesis of Other Secondary Metabolites	0.1064	2.674	96.28	0.0074	0.00761			Biosynthesis of Other Secondary Metabolites	0.1051	3.933	93.89	0.00732	0.00761		Metabolism of Other Amino Acids	0.09319	2.204	96.53	0.0152	0.0153
	Metabolism of Other Amino Acids	0.08844	2.223	98.51	0.0152	0.0152			Metabolism of Other Amino Acids	0.09122	3.413	97.3	0.0153	0.0152		Biosynthesis of Other Secondary Metabolites	0.08905	2.106	98.64	0.0074	0.00732
	Enzyme Families Metabolism	0.05938	1.492	100	0.0213	0.0213			Enzyme Families Metabolism	0.07208	2.697	100	0.0215	0.0213		Enzyme Families Metabolism	0.05764	1.363	100	0.0213	0.0215
	Spring/Summer/Autumn 3.627 Average bray-curtis dissimilarity
	Taxon	Av. dissim	Contrib. %	Cumulative %	Mean Spring	Mean Summer	Mean Autumn
	Amino Acid Metabolism	0.6292	17.35	17.35	0.0877	0.089	0.0857
	Nucleotide Metabolism	0.6026	16.62	33.97	0.0439	0.0373	0.0372
	Carbohydrate Metabolism	0.4782	13.18	47.15	0.11	0.105	0.106
	Xenobiotics Biodegradation and Metabolism	0.3673	10.13	57.28	0.0225	0.0198	0.0197
	Energy Metabolism	0.3583	9.879	67.16	0.0551	0.0529	0.052
	Metabolism of Cofactors and Vitamins	0.2546	7.019	74.18	0.0368	0.0388	0.038
	Glycan Biosynthesis and Metabolism	0.2454	6.766	80.94	0.02	0.0214	0.0227
	Lipid Metabolism	0.2322	6.401	87.34	0.0311	0.029	0.0287
	Metabolism of Terpenoids and Polyketides	0.2048	5.647	92.99	0.0171	0.0152	0.0147
	Biosynthesis of Other Secondary Metabolites	0.1002	2.762	95.75	0.0074	0.00761	0.00732
	Metabolism of Other Amino Acids	0.09095	2.508	98.26	0.0152	0.0152	0.0153
	Enzyme Families Metabolism	0.06303	1.738	100	0.0213	0.0213	0.0215
